# Supplementary figures and images for: Identification and Characterization of Circular RNAs in Mammary Tissue from Holstein Cows at Early Lactation and Non-Lactation
Source: MDPI journal article supplement (doi:10.3390/biom12030478), 2022-03-21

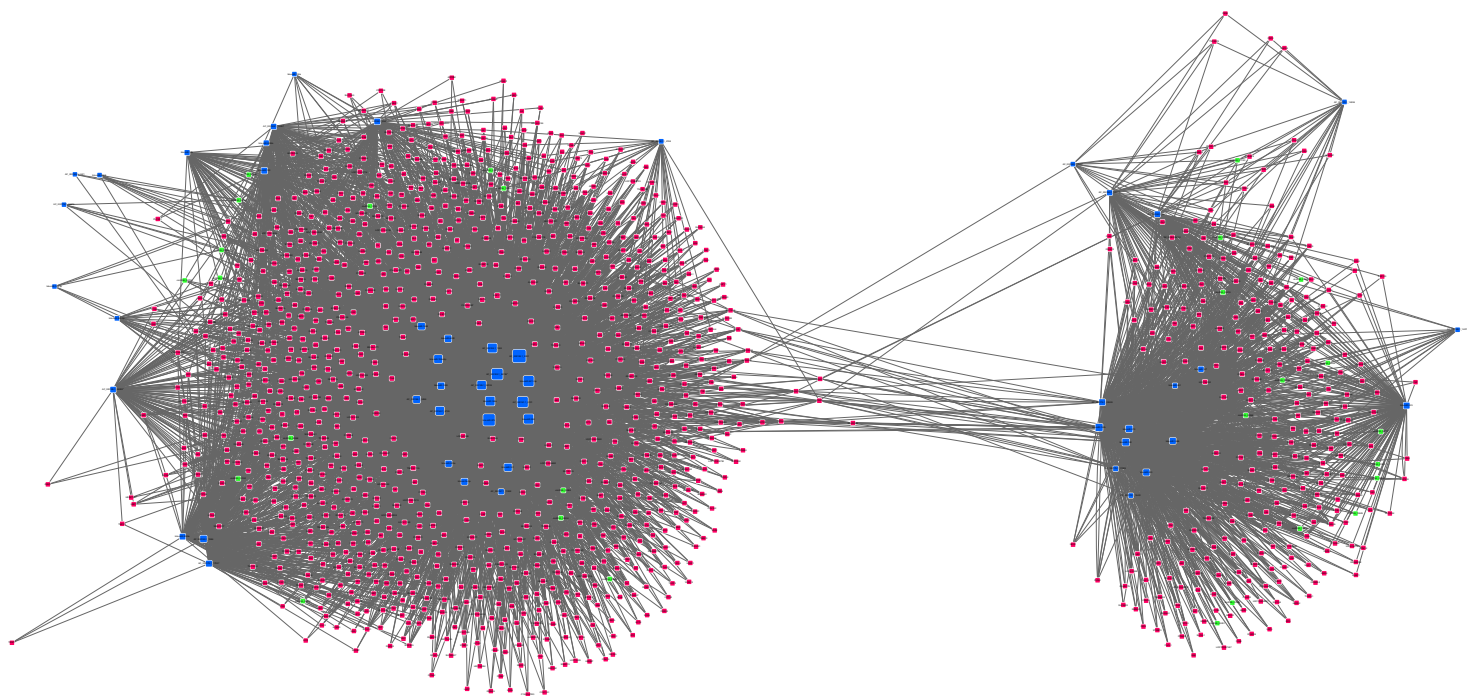

Supplement: s1 [file s1]
